# Supplementary material
Source: MDPI journal article supplement (https://www.mdpi.com/2077-1312/10/11/1593)
Supplement: s1 [file s1]

**Table 2S.** Mean±SD of each analyzed parameter. t-test values are also presented with df=degrees of freedom.  
In bold the significant values per  $p < 0.05$ .

| Behaviour             | Salinity 20             |                         | Salinity 30                |                         |
|-----------------------|-------------------------|-------------------------|----------------------------|-------------------------|
|                       | <i>P. elegans</i>       | <i>P. macrodactylus</i> | <i>P. elegans</i>          | <i>P. macrodactylus</i> |
| Latency time (s)      | 52.35±61.52             | 79.80±99.07             | 171.58±133.59              | 186.08±199.58           |
| Sample size           | n=8                     | n=8                     | n=8                        | n=8                     |
| t-test (df=1,14)      | F=0.074; p=0.79         |                         | F=0.025; p=0.88            |                         |
| Residence time (s)    | 277.43±395.24           | 1096.13±692.57          | 150.96±313.79              | 1416.90±265.00          |
| Sample size           | n=8                     | n=8                     | n=8                        | n=8                     |
| t-test (df=1,14)      | <b>F=5.571; p=0.033</b> |                         | <b>F=18.60; p=0.000716</b> |                         |
| Frequency of escapes  | 3.38±2.72               | 2.38±5.95               | 4.88±4.73                  | 0.26±0.35               |
| Sample size           | n=8                     | n=8                     | n=8                        | n=8                     |
| t-test (df=1,14)      | F=0.187; p=0.672        |                         | <b>F=8.01; p=0.0134</b>    |                         |
| Frequency of chasings | 3.50±2.98               | 4.50±5.90               | 1.63±2.33                  | 3.50±2.88               |
| Sample size           | n=8                     | n=8                     | n=8                        | n=8                     |
| t-test (df=1,14)      | F=0.183; p=0.675        |                         | F=2.053; p=0.174           |                         |
