# Supplementary material
Source: MDPI journal article supplement (https://www.mdpi.com/2077-1312/10/11/1593)
Supplement: s1 [file s1]

**Table 1S.** Weight (g) of the animal used in the 16 trials (8 trials at 2 salinities).  
t-test values are also presented with df=degree of freedom.

| Trial            | Salinity 20       |                         | Salinity 30       |                         |
|------------------|-------------------|-------------------------|-------------------|-------------------------|
|                  | <i>P. elegans</i> | <i>P. macrodactylus</i> | <i>P. elegans</i> | <i>P. macrodactylus</i> |
| 1                | 0.646             | 0.704                   | 0.367             | 0.448                   |
| 2                | 0.997             | 0.993                   | 0.349             | 0.392                   |
| 3                | 0.413             | 0.434                   | 0.576             | 0.456                   |
| 4                | 0.956             | 1.014                   | 0.865             | 0.953                   |
| 5                | 0.907             | 0.923                   | 0.753             | 0.602                   |
| 6                | 1.08              | 1.016                   | 0.856             | 0.731                   |
| 7                | 0.865             | 0.785                   | 0.995             | 0.913                   |
| 8                | 0.683             | 0.599                   | 0.684             | 0.835                   |
| Mean+SD          | 0.82±0.22         | 0.81±0.22               | 0.68±0.24         | 0.67±0.22               |
| t-test (df=1,14) | F=0.008; p=0.929  |                         | F=0.016; p=0.902  |                         |
